1 **Frequency-specific meso-scale structure of spontaneous oscillatory activity in**  
2 **the human brain**

3 Riccardo Iandolo<sup>1\*</sup>, Marianna Semprini<sup>1</sup>, Dante Mantini<sup>2,3</sup>, Stefano Buccelli<sup>1</sup>, Diego Sona<sup>4,5</sup>,  
4 Laura Avanzino<sup>6,7#</sup>, and Michela Chiappalone<sup>1#</sup>

5 *\*Corresponding Author*

6 *#Equal Senior Author*

7 <sup>1</sup> Rehab Technologies, Istituto Italiano di Tecnologia, 16163 Genova, Italy;

8 <sup>2</sup> Research Center for Motor Control and Neuroplasticity, KU Leuven, 3001 Leuven, Belgium;

9 <sup>3</sup> Brain Imaging and Neural Dynamics Research Group, IRCCS San Camillo Hospital, 30126 Venice, Italy;

10 <sup>4</sup> Pattern Analysis & Computer Vision, Istituto Italiano di Tecnologia, 16152, Genova, Italy;

11 <sup>5</sup> Neuroinformatics Laboratory, Fondazione Bruno Kessler, 38123 Povo (Trento), Italy;

12 <sup>6</sup> Department of Experimental Medicine, Section of Human Physiology, University of Genova, 16132  
13 Genova, Italy;

14 <sup>7</sup> Ospedale Policlinico San Martino, IRCCS, 16132 Genova, Italy.

15

16 **Corresponding Author**

17 Dr. Riccardo Iandolo, PhD

18 Rehab Technologies IIT-INAIL Lab

19 Istituto Italiano di Tecnologia

20 Via Morego 30

21 16163 Genova Italy

22 e-mail: [riccardo.iandolo@iit.it](mailto:riccardo.iandolo@iit.it)

23

24

25

## 26 **Abstract**

27 Recent studies provided novel insights into the meso-scale organization of the brain, highlighting the co-  
28 occurrence of different structures: classic assortative (modular), disassortative and core-periphery.  
29 However, the spectral properties of the brain meso-scale remain unexplored. To fill this knowledge gap,  
30 we investigated how this meso-scale structure is organized across the frequency domain. We analyzed the  
31 resting state activity of healthy participants with source-localized high-density electroencephalography  
32 signals. Then, we inferred the community structure using weighted stochastic block-modelling to capture  
33 the landscape of meso-scale structures across the frequency domain. Despite meso-scale modalities were  
34 mixed over the entire spectrum, we found a selective increase of disassortativity in the delta/theta bands,  
35 and of core-peripheriness in the low/high gamma bands. We observed, for the first time, that the brain at  
36 rest shows frequency-specific meso-scale organizations supporting spatially distributed and local  
37 information processing, shedding new light on how the brain coordinates information flow.

38

## 39 Introduction

40 Functional connectivity (FC), i.e. the statistical association among neural signals of separate brain regions  
41 (1), has received a great deal of attention during the last years (2). FC has been widely recognized as a tool  
42 to investigate spatio-temporal properties of brain networks. These networks have been characterized at  
43 different levels of topological organization (3), ranging from local (single brain area or node) to global  
44 (whole-brain network) (4), through the intermediate level referred to as meso-scale (5). The single unit of  
45 the meso-scale architecture is a “community” (or module), which is composed by a set of nodes sharing  
46 similar connectivity patterns. Modules are crucial elements of FC network organization since they are  
47 essential to identify areas belonging to the same functional domain. Moreover, modules well describe  
48 network resilience and flexibility in response to external perturbation (as in the case of occurred cerebral  
49 lesions) and also they shape the information flow (6). To date, the meso-scale structure of the human brain  
50 has been extensively investigated by community detection algorithms prone to detect “assortative” (also  
51 defined as “modular”) meso-scale structure (5, 7, 8), for a review see (9). Briefly, in the assortative  
52 structure, the within-community densities are greater than the between-community densities. In other  
53 words, this structure facilitates information processing of segregated modules while the integration  
54 capability between them is reduced (10).

55 Recently, non-assortative community interactions have been also described, such as the “disassortative”  
56 and the “core-periphery” (5). A disassortative structure is complementary to the assortative one . This is  
57 characterized by the connections between communities being greater than within communities, thus  
58 suggesting a strong flow of information between different modules. In the core-periphery structure, the  
59 nodes of a high-density *core* strongly interact with nodes of other *periphery* communities, which are  
60 characterized by poorly connected nodes. This structure thus allows an efficient broadcasting of information  
61 between core and peripheries (10). Importantly, it has been recently shown that these three classes (i.e.  
62 assortative, disassortative and core-periphery) may coexist in the brain, forming the so-called mixed meso-  
63 scale structure (5, 9). Therefore, it is pivotal to detect the richness and diversity of meso-scale organization,  
64 without being constrained by the assortative one (5, 10). To this purpose, algorithms have been proposed  
65 in the literature (11), such as the Weighted Stochastic Block Model (12) (WSBM) able to capture the meso-  
66 scale diversity. An important feature of WSBM is the exploitation of the stochastic equivalence principle,  
67 according to which the network nodes belonging to a given community have the same probability of being  
68 connected with all the remaining nodes of the network (12). The WSBM can detect other modalities of  
69 meso-scale modules interactions, beyond assortativity (5). Recent studies investigating human (5, 10, 13)  
70 and non-human networks (14, 15) made use of the WSBM method. In these investigations, human  
71 connectomes were derived with magnetic resonance imaging (MRI), using either functional (during both  
72 rest (5) and task (10)) or structural data (5, 13). In particular, it was observed that assortative communities  
73 dominate resting state FC with the co-existence of other non-assortative communities (10). Overall, these  
74 results indicated that brain networks are not characterized by a unique community structure.

75 Motivated by the above findings, we aimed at investigating whether resting state FC meso-scale structures  
76 can exhibit a more diverse and richer organization when using non-invasive electrophysiological  
77 techniques. Notably, high-density electroencephalography (hdEEG) provides a unique opportunity to  
78 capture the richness of neuronal oscillations’ spectral content (16). HdEEG was recently employed to  
79 reconstruct and unravel novel features of human brain activity during resting state in health (17-19) and  
80 disease (20-23). By coupling hdEEG recordings with appropriately built head model conductors and with  
81 source reconstruction algorithms, it is possible to achieve neural source reconstruction with relatively good  
82 spatial resolution (24) (in the order of less than 1 cm). This permitted the estimation of large-scale resting  
83 state networks that spatially overlap with those obtained with functional MRI (fMRI) (18) and

84 magnetoencephalography (MEG) (25). Thus, we posit that describing the time-frequency features of FC  
85 meso-scale architecture estimated from source-localized hdEEG recordings will have important  
86 implications to highlight novel properties of the human brain at rest (26-28).

87 With this aim, we here exploited the peculiar features of hdEEG-based source imaging, to identify modules  
88 of spontaneous oscillatory activity. Specifically, we tested whether the meso-scale structure is frequency-  
89 dependent. In other terms, we examined if assortative, disassortative and core-periphery modalities are  
90 tuned onto a specific frequency or they are equally distributed over the frequency domain. To address these  
91 questions, we applied the WSBM to FC adjacency matrices estimated from source-localized hdEEG  
92 recordings of healthy participants (17, 18, 29). We first selected the best number of communities to perform  
93 WSBM community detection with a data-driven approach. Then, we defined the cortical and sub-cortical  
94 spatial distribution of modules in both time and frequency domains, respectively, and we finally described  
95 the assortative, disassortative and core-periphery community interactions across frequency bands. Thus, we  
96 observed that the brain at rest relies on peculiar topological meso-scale organization supporting spatially  
97 distributed and local information processing. Our results improve and extend the knowledge of resting state  
98 meso-scale organization and the way in which the brain propagates the information, leveraging the  
99 frequency-specific variability of the meso-scale structure.

100

## 101 **Results**

102 In this study, we reconstructed neural sources per each participant and we then mapped them onto 384  
103 regions of interest (ROIs) of the AICHA atlas (30). This procedure defined the nodes for the subsequent  
104 meso-scale structure investigation. We then extracted the FC adjacency matrices and applied the WSBM.  
105 We investigated the organization of the meso-scale structure across time (i.e. full bandwidth) and  
106 frequencies. When presenting the results, we localized the wavelet carrier frequencies (i.e. 2, 4, 8, 16, 32  
107 and 64 Hz) to the corresponding EEG spectral bands, as in our previous work (29), where the bands are  
108 defined as delta ( $\delta$ , 1-4 Hz), theta ( $\theta$ , 4-8 Hz), alpha ( $\alpha$ , 8-13 Hz), beta ( $\beta$ , 13-30 Hz), and gamma ( $\gamma$ , 30-80  
109 Hz).

### 110 **Identification of meso-scale communities**

111 To evaluate the clustering performance, we used the Normalized Variation of Information (NVI), which  
112 identify a good clustering performance with values near to zero (31). Searching for a good clustering, we  
113 made experiments with a variable number of cluster  $K$ , ranging from 2 to 16 and we observed (see Figure  
114 1) that only with less than 6 clusters the clustering performance was good ( $0.0079 \pm 0.0023$ ,  $0.011 \pm 0.0036$ ,  
115  $0.014 \pm 0.012$ , and  $0.015 \pm 0.0059$ , mean  $\pm$  SD, for  $K=2, \dots, 5$  respectively). We excluded  $K = 2$  from the  
116 range of possible solutions because for this value we could only had one community interaction, preventing  
117 us from investigating the meso-scale richness. With  $K = 4$  communities, some fits terminated in different  
118 local maxima (see light-blue lines in Figure 1a and red crosses in Figure 1b) leading to a higher degree of  
119 variability than  $K = 3$  and  $K = 5$ . Instead, for  $K \geq 6$ , the NVI values increased sharply, suggesting that  
120 greater  $K$ -values were not worth being considered.

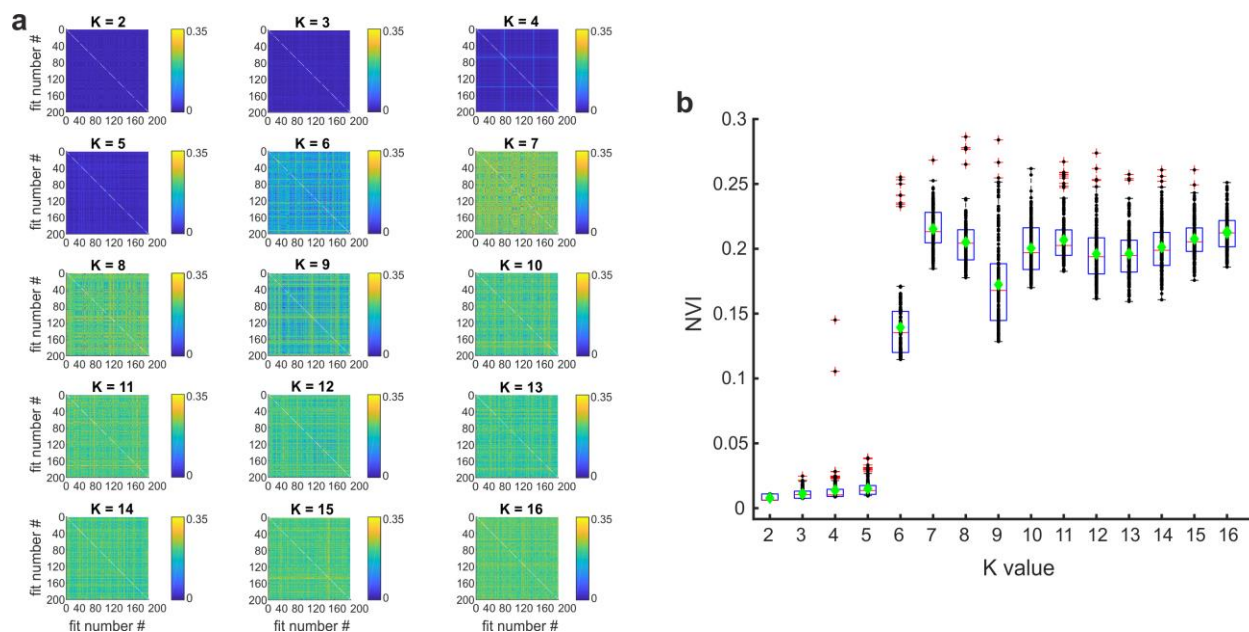

121  
 122 **Fig. 1. Parameter selection conducted by means of Normalized Variation of Information (NVI).** **a** Pairwise  
 123 comparisons of all the 200 fits from  $K = 2$  until  $K = 16$ . Dark blue and yellow elements indicate respectively a pair of  
 124 fits showing a good (low NVI) and weak (high NVI) clustering performance, as indicated by the colorbar. Self-fit  
 125 comparisons are depicted in white. Note that all the matrices are symmetric. **b** Distributions of the NVI values obtained  
 126 by averaging the matrices containing the fits' pairwise comparisons depicted in panel a. Boxplots' upper and lower  
 127 boundary exhibited 25<sup>th</sup> and 75<sup>th</sup> percentile, respectively. Data points (black dots) are overlaid over boxplots. Green  
 128 diamonds and red lines indicates mean and median value of the distributions, respectively. Red crosses indicate  
 129 outliers.

130 Despite the fact that the optimization problem was non-convex, the WSBM converged almost always to the  
 131 same solution for  $K$ -values smaller than 6, as shown by the small variability of the NVI (see boxplots in  
 132 Figure 1B). For those values, the variance of the data was small when compared to the variance for the  
 133 higher values of  $K \geq 6$  (Figure 1b). The reached local maxima were not consistent for higher  $K$  values,  
 134 suggesting that the algorithm struggled to get similar results across trials. Thus, the assessment of the  
 135 clustering performance suggested to partition the resting state activity with the  $K$ -values for which the NVI  
 136 was closer to zero. Among these values, we selected  $K = 5$  as  $K_{\text{best}}$  because: i) it offered a good compromise  
 137 between the granularity of FC network parcellation and reliable clustering performance; ii) it was consistent  
 138 with similar choices made in recent fMRI literature of WSBM applied to human connectome datasets (5,  
 139 10). To check whether the clustering performance showed a consistent behavior across  $K$ -values, we also  
 140 calculated other performance parameters: the Adjusted Rand Index (32) (ARI) and the Normalized Mutual  
 141 Information (31) (NMI) (see Methods) that both led to the same outcome (Supplementary Figure S1 and  
 142 Supplementary Figure S2).

### 143 Meso-scale connectivity structure in time domain

144 The original full bandwidth adjacency matrix ( $ADJ^T$ , where the superscript T refers to time domain, see  
 145 Methods and Figure 2, panel a1) was reordered based on the WSBM community assignment (with  $k_{\text{best}} =$   
 146 5, see Figure 2, panel a2), which was then overlaid onto the T1-weighted template (see Figure 2b) to better  
 147 appreciate its spatial distribution (see Methods for details about the computation of best community  
 148 assignment). The first community (purple cluster) showed a medial and lateral spatially distributed pattern.



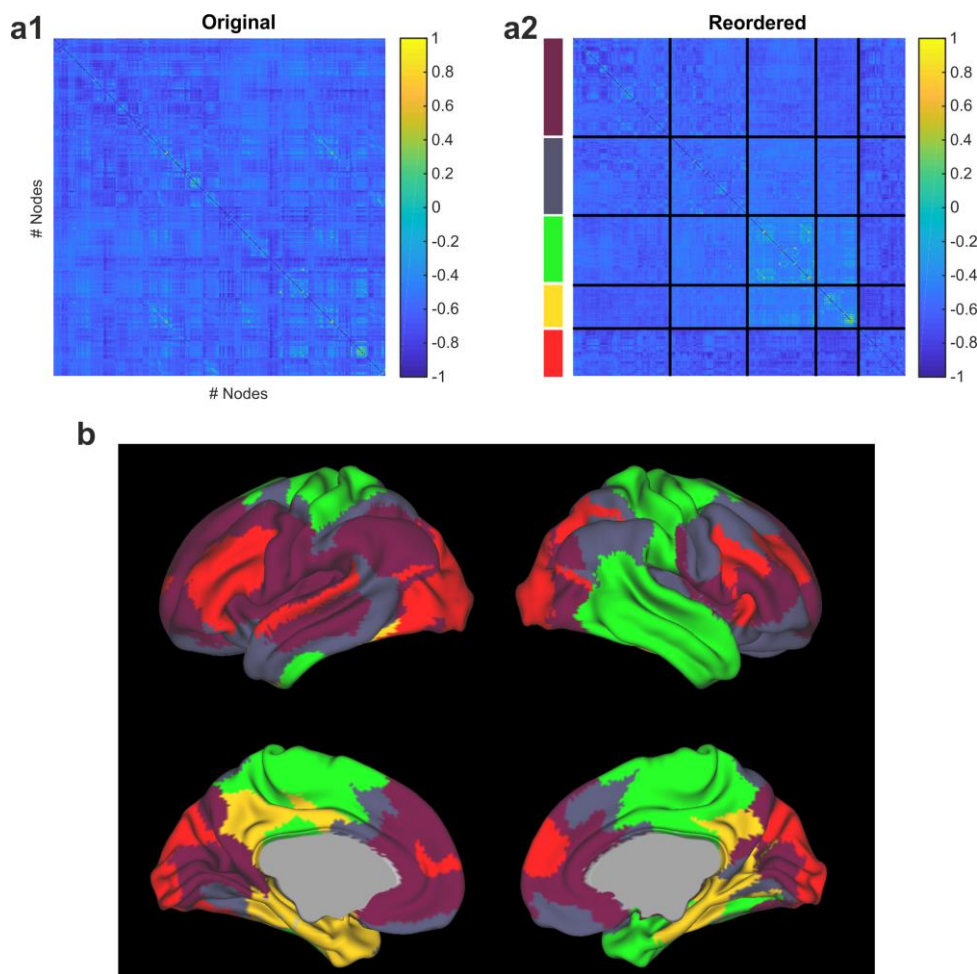

149

150 **Fig. 2. Community assignment at  $K_{best} = 5$  for the group-representative matrix in the time domain.** a1 Adjacency  
151 matrix prior to community detection (nodes of the AICHA atlas,  $N = 384 \times 384$ ). First 192 and last 192 nodes indicated  
152 left and right hemisphere, respectively. The colorbar represents connection strength mapped onto the interval  $[-1, +1]$ ,  
153 see Methods. a2 Reordered adjacency matrix according to the best community assignment after WSBM estimation.  
154 Colored rectangles on the left side of the adjacency matrix represent the 5 resulting clusters. b Spatial distribution of  
155 the best estimated communities, cluster colors as in a2.

156 Despite its intrinsic variability, it can be roughly associated with an executive function as it largely covers  
157 the left frontal lobe. As the first, also the second community (dark gray cluster) exhibited a complex spatial  
158 distribution. In this case, the left areas clustered predominantly in parieto-temporo-occipital (PTO) cortex  
159 while the right areas in frontal lobe. On the other hand, the remaining three clusters presented a compact  
160 spatial localization (in particular in the medial areas). We assigned them to three separate functional  
161 domains: mostly sensorimotor (bilateral motor and sensory cortices encompassing also the right temporal  
162 lobe, green cluster), limbic (medial temporal lobe and cingulate gyrus, yellow cluster) and visual (occipital  
163 lobe, red cluster). However, the latter approximately spanned other cortical areas, until the frontal and left  
164 temporal lobe and this occipital-fronto-temporal gradient resembled the ventral and dorsal streams linked  
165 to visual stimuli processing. Then, we investigated the between-community interactions across participants,  
166 calculating the percentage of assortative, disassortative and core-periphery motifs in the time domain. We  
167 found a significant effect of the meso-scale classes (Kruskal-Wallis test,  $p < 0.0001$ , see Figure 3a).

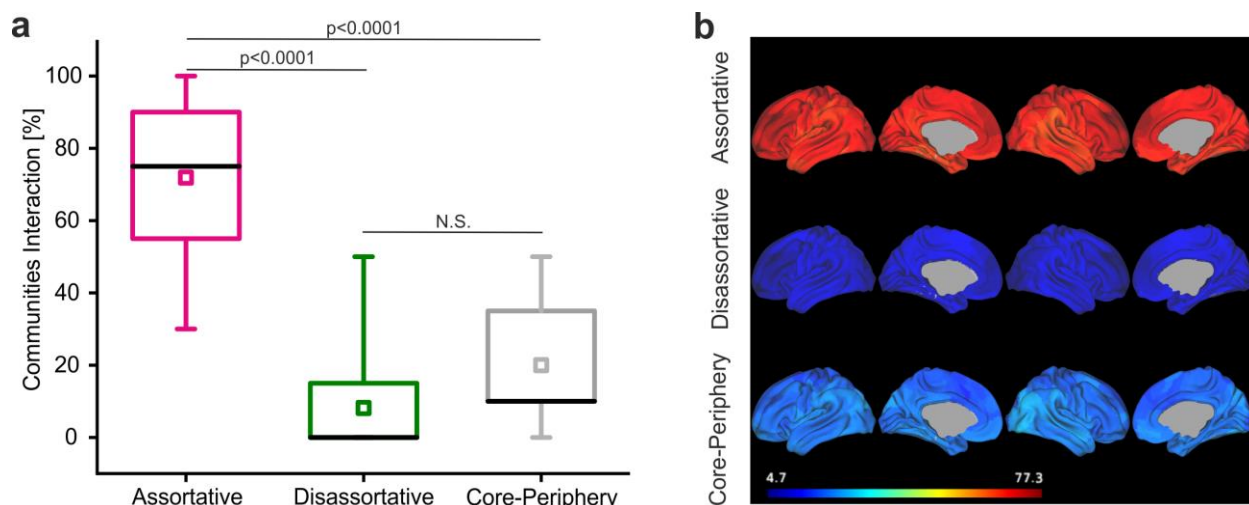

168  
 169 **Fig. 3. Organization of the meso-scale structure in the time domain.** **a** Boxplots representing distribution of the  
 170 meso-scale classes across participants. Magenta: assortative; green: disassortative; gray: core-periphery. Boxplots  
 171 show upper and lower bound of the distributions at 25<sup>th</sup> and 75<sup>th</sup> percentile. Whiskers indicate the 1<sup>st</sup> and 99<sup>th</sup>  
 172 percentile. The black horizontal lines represent the median, while the small colored squares indicate the mean of the  
 173 distributions. N.S. indicates non-statistically significant comparison as revealed by post-hoc comparison of mean  
 174 ranks. **b** Mean community classes across participants: assortative (top), disassortative (middle) and core-periphery  
 175 (bottom). The colorbar is kept fixed to the minimum and maximum values across the meso-scale modalities. See  
 176 Figure S3 in the Supplementary Materials where the same plot is showed with a different colorbar for each meso-scale  
 177 interaction.

178 Furthermore, the post-hoc test for multiple comparisons showed a significant increment of the assortative  
 179 with respect to both disassortative and core-periphery structure ( $p < 0.0001$  in both cases, see Figure 3a).  
 180 Instead, there was no significant difference between the disassortative and core-periphery class ( $p = 0.067$ ,  
 181 see Figure 3a). This can be observed also in Figure 3b (and Figure S3 in Supplementary Materials) where  
 182 we overlaid the percentages of the three modalities onto the T1-weighted template. As expected, we  
 183 observed that the meso-scale spatial organization of the source-level time courses reflected the behavior  
 184 depicted in Figure 3a. In fact, there was a clear whole-brain predominance of the assortative structure (see  
 185 Figure 3b). Brain regions which showed the greatest assortativity level were located in bilateral medial and  
 186 lateral prefrontal cortices as well as in the occipital lobe visual areas (yellow and red regions, top row  
 187 Supplementary Figure S3). These were the areas with low disassortative interaction (blue-light blue regions,  
 188 middle row Supplementary Figure S3). Conversely, the areas showing higher level of disassortativity are  
 189 medial areas such as the posterior cingulate cortex together with the sensorimotor and temporal cortex.  
 190 Furthermore, the areas exhibiting the greatest level of core-periphery structure were focally localized in the  
 191 PTO cortex (yellow and orange regions, bottom row Supplementary Figure S3).

192

### 193 Frequency analysis of meso-scale connectivity structure

194 We examined the community assignments across the six carrier frequencies considered ( $ADJ^F(f)$ ), where  
 195 the superscript  $F$  refers to frequency domain and  $f$  are the wavelets' carrier frequencies, see Methods). As  
 196 for the delta band (see Figure 4, panel a1), we obtained an association cluster, almost entirely located in the  
 197 right hemisphere (corresponding roughly to somatic areas, and association PTO cortex, purple). Another  
 198 lateralized cluster was obtained in the left hemisphere, putatively associated with executive functions  
 199 (frontal and temporal lobe, dark gray). Finally, we obtained a "limbic" cluster, related to phylogenetically

200 old regions (medial areas in both hemisphere, orbito-frontal cortex, green cluster). The remaining two  
201 clusters were spanning several areas (the primary and premotor cortices bilaterally and parietal lobe, yellow  
202 and red clusters).

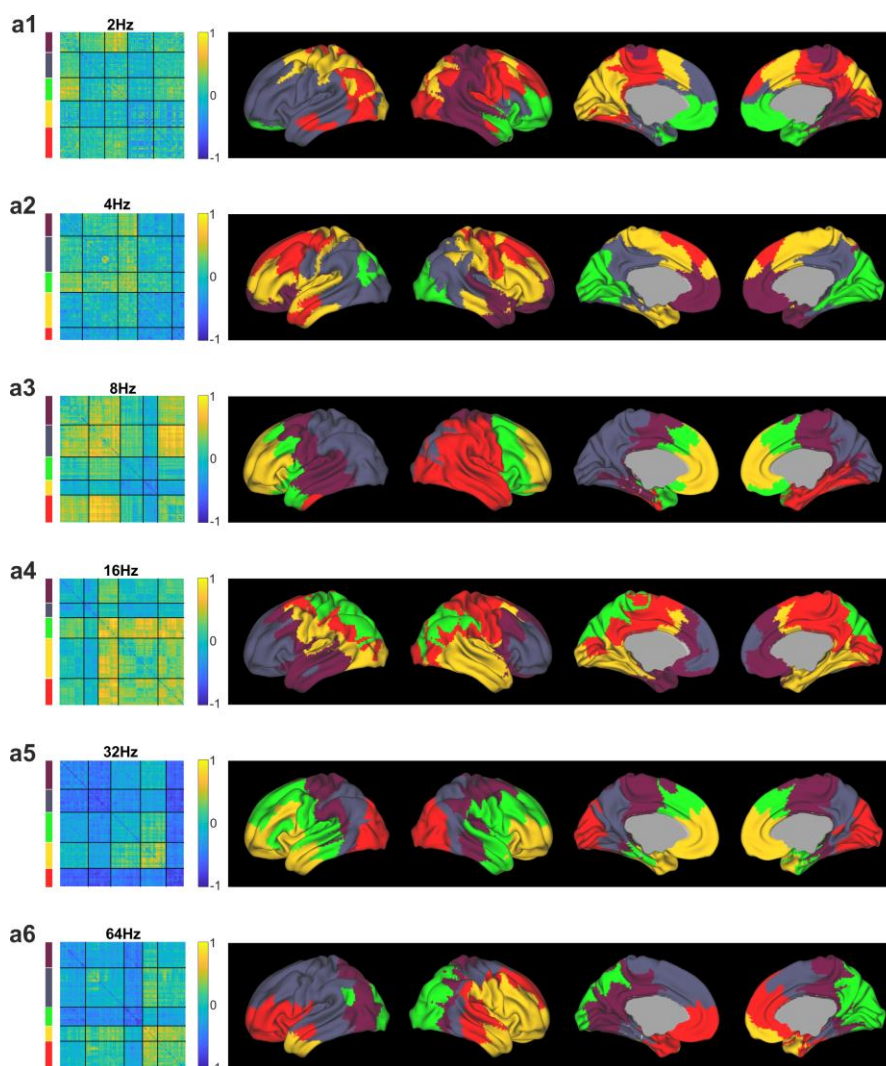

203  
204 **Fig. 4. Organization of the meso-scale structure in the frequency domain.** Each row represents the best community  
205 assignments ( $K_{\text{best}} = 5$ ) in each of the considered carrier frequency: 2 Hz (**a1**), 4 Hz (**a2**), 8 Hz (**a3**), 16 Hz (**a4**), 32 Hz  
206 (**a5**), 64 Hz (**a6**). Each row contains the re-ordered group-representative adjacency matrix after WSBM estimation  
207 and spatial distribution of partitions across the brain. Colors on left side of each adjacency matrix match with the  
208 colors overlaid on the brain.

209 As for the theta oscillations (see Figure 4, panel a2), the block-modelling partitioning associated brain areas  
210 in the medial orbito-frontal cortex (purple), in the parietal lobe and posterior cingulate cortex (PCC)  
211 (“sensory association” cluster, dark gray), in the visual areas (primary and higher order visual cortices,  
212 green), in the frontal and parietal lobes (a “mixed” cluster, yellow) and in the frontal and temporal cortices  
213 (red cluster).

214 As for the alpha rhythm (see Figure 4, panel a3), the generated cluster were approximately the left temporal  
215 and frontal lobe (purple), the sensory multimodal regions (primary and secondary visual cortices and the  
216 associated dorsal stream, dark gray), the right and left premotor areas (green), the limbic structures (yellow)



217 and the right PTO cortex (red). The latter cluster, roughly recalled the association cluster of the lower delta  
218 oscillations.

219 As for the beta band (see Figure 4, panel a4), the clusters covered bilateral premotor and prefrontal cortices  
220 (purple and dark gray), and mixed areas, with a cluster spanning the dorsal areas in the parietal lobe (green),  
221 bilateral temporal lobes (mainly right) and left prefrontal association cortex (yellow), PTO and cingulate  
222 cortices (red).

223 As for the low gamma oscillations (see Figure 4, panel a5), the clustering showed two sensory partitions:  
224 one that mainly gathered the primary and secondary somatosensory areas in the parietal lobe (purple) and  
225 the posterior parietal cortex (dark gray). Other clusters correspond to the executive cluster (motor and  
226 prefrontal cortex, green), the limbic cluster (yellow) and the visual cluster (red).

227 Finally, as for the high gamma rhythm (see Figure 4, panel a6), a parietal and cingulate cortex cluster  
228 emerged (purple) together with a “sensori-motor” cluster (bilateral sensorimotor cortices, expanding to left  
229 temporal lobe, dark gray). A third cluster was located in the occipital lobe (green). Lastly, we found two  
230 clusters (yellow and red) predominantly encompassing limbic areas, as well as orbito-frontal and prefrontal  
231 cortex.

232 Overall, for brain areas close to the midline, we found more symmetric spatial distribution of clusters than  
233 in the laterally located areas. Indeed, when moving towards more lateral regions, the clusters spatial pattern  
234 became more complex than the one observed in medial areas. Furthermore, we found that higher rhythms  
235 were more likely characterized by functionally distinct clusters than lower frequencies.

### 236 **Community structure in the frequency domain is diverse and non-assortative**

237 To answer the question whether meso-scale structure is frequency-specific, we investigated possible  
238 differences among the six carrier frequencies considering all three community classes (i.e. assortative,  
239 disassortative, core-periphery). For the assortative class, we did not find any significant difference across  
240 the six bands ( $p = 0.083$ ), suggesting that the assortative structure is homogeneously distributed across  
241 frequency bands (see Figure 5a). Instead, we had a statistically significant effect concerning the  
242 disassortative and core-periphery structure (for both,  $p < 0.0001$ ), as revealed by non-parametric testing.  
243 Specifically, modules of spontaneous activity interacted in a more disassortative manner in the delta and  
244 low theta bands (2 Hz, 4 Hz) than the beta and gamma bands (32 Hz, 64 Hz), see Figure 5a and  
245 Supplementary Table 1. In addition, a further decrease, albeit weakly significant ( $p = 0.045$ , see  
246 Supplementary Table 1), of the low beta (16 Hz) with respect to gamma band (64 Hz) existed. On the other  
247 hand, when considering the core-periphery structure, the beta and gamma rhythms (16 Hz, 32 Hz, 64 Hz)  
248 showed an increase with respect to the delta and theta rhythms (2 Hz, 4 Hz), see Figure 5a and  
249 Supplementary Table 2. We additionally found another weakly significant increase of core-periphery  
250 community interactions between 2 Hz and 8 Hz ( $p = 0.042$ , see Supplementary Table 2).

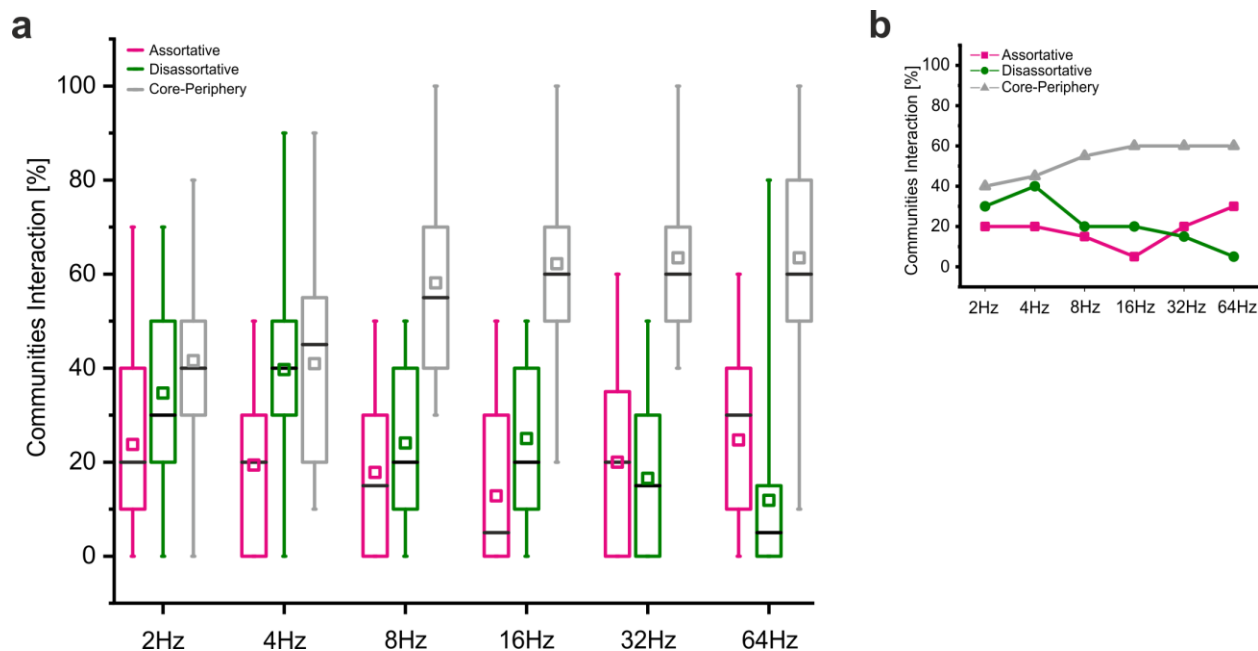

251  
 252 **Fig. 5. Organization of the meso-scale structure in the time-frequency domain.** **a** Boxplots representing  
 253 distributions across participants of the three meso-scale classes for each carrier frequency. Magenta: assortative; green:  
 254 disassortative; gray: core-periphery. Boxplots show upper and lower bound of the distributions at 25<sup>th</sup> and 75<sup>th</sup>  
 255 percentile. Whiskers indicate the 1<sup>st</sup> and 99<sup>th</sup> percentile. The black horizontal lines represent the median, while the  
 256 small colored squares indicate the mean of the distributions. Statistical analysis for multiple comparisons across carrier  
 257 frequencies of the depicted data is reported in Table 1 and Table 2 in the Supplementary Materials. **b** Median values  
 258 of each meso-scale structure distributions (black horizontal lines in a) across frequency bands.

259 Overall, we observed complementary trends along the entire range of oscillatory rhythms (i.e. delta and  
 260 theta vs. gamma). Specifically, for increasing frequencies we found respectively a decreasing disassortative  
 261 and an increasing core-periphery trend (see Figure 5b). This phenomenon was not observed for low  
 262 frequencies (i.e. alpha). Finally, we averaged across participants the total amount of meso-scale modalities  
 263 and we then overlaid these values onto the T1-weighted template (see Figure 6). We observed that the core-  
 264 periphery structure was predominant starting from alpha/beta bands and peaking in low and high gamma  
 265 bands. The prefrontal and PTO areas showed the highest degree of core-periphery (see Figure 6 and  
 266 Supplementary Figure S4) and this was true also when progressively moving towards higher-frequency  
 267 oscillations. In addition, the medial areas belonging to limbic system showed a low degree of core-periphery  
 268 in the higher rhythms. When considering the lowest delta/theta bands the core-periphery pattern decreased  
 269 its overall amount. This decrease in core-periphery organization corresponded to an emerging role of the  
 270 disassortative structure. Despite this increase, the amount of disassortative and core-periphery was still  
 271 comparable. Concerning the disassortative structure, there was a spatial gradient increasing from anterior-  
 272 medial to posterior areas emerging in the alpha and beta band. Instead, the opposite gradient (i.e. increasing  
 273 in posterior-anterior direction) was found for the core-periphery structure, in the same bands.

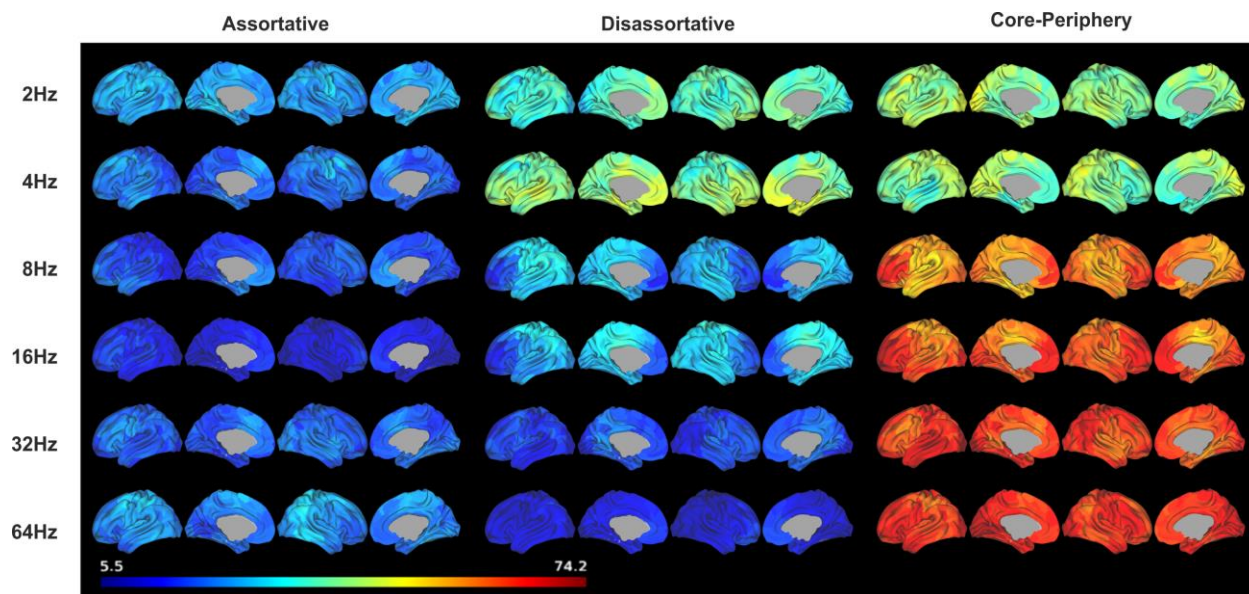

274

275 **Fig. 6. Mean community classes across participants in the frequency domain.** Each column indicates the meso-  
276 scale class (assortative, disassortative, core-periphery) while each row indicates the carrier frequency (2 Hz, 4 Hz, 8  
277 Hz, 16 Hz, 32 Hz, 64 Hz). The colorbar is kept fixed to the minimum and maximum values across the meso-scale  
278 modalities. See Figure S4 in the Supplementary Materials where the same plot is showed with colorbar customized  
279 between minimum and maximum values within each meso-scale modality.

280

## 281 Discussion

282 To date, the features of human brain meso-scale structure during resting state have not been fully explored.  
283 Specifically, the meso-scale spectral fingerprints are still unknown and evidences about how the diversity  
284 of meso-scale structure (i.e. assortative, disassortative and core-periphery) organizes over the frequency  
285 spectrum are missing. Thus, we aimed at filling this knowledge gap, by using WSBM to infer the richness  
286 of the latent community structure estimated from source-reconstructed hdEEG signals. We indeed described  
287 the spatial distribution of communities and their interactions across time and frequency domains. Our  
288 analysis showed that the meso-scale is characterized by a frequency-specific organization. We highlighted  
289 that community structure in the frequency domain is characterized by a high level of non-assortativity.  
290 Finally, we found that association areas exhibited the highest degree of integration, as revealed by the high  
291 incidence of core-periphery structure for those areas.

292

### 293 Parameter selection in the time domain

294 To the best of our knowledge, no previous hdEEG study has been conducted to investigate WSBM  
295 community detection. We thus shaped our analysis on an already published procedure on Blood  
296 Oxygenation Level Dependent (BOLD) signals oscillations, where the authors fitted the WSBM to group-  
297 representative adjacency matrix (5). Thus, we performed the parameter selection procedure in the time  
298 domain and we kept the chosen best K in the frequency domain to compare the community detection results  
299 in different frequency bands. One may argue that the time domain is affected by the problem of volume  
300 conduction (33). However, many approaches have been proposed to attenuate such effect for  
301 electrophysiological recordings (for a review, see (34)). Among all, we applied spatial filtering during  
302 sources reconstruction, which mitigates the negative effects of volume conduction on FC (34). Indeed, we  
303 employed spatial filtering for the analysis in the time domain, whereas, for spectral analysis, we combined

304 both spatial filtering and the method of power spectra orthogonalization (27), which has been largely  
305 accepted and validated (35) even by recent studies employing both low and high density montages (17, 26,  
306 29, 36). Moreover, time domain analysis is a valid tool to estimate the  $K_{\text{best}}$  and for the further comparisons  
307 of the meso-scale structure in the frequency domain, because the time-courses of source-reconstructed  
308 hdEEG signals contain all the neuronal oscillations of interest, that are then band-pass filtered during  
309 spectral analysis.

310 According to the above, we performed parameter selection in the time domain. The goal of parameter  
311 selection in a community detection problem is to find models which have to be simultaneously simple and  
312 good at describing the system (11). We thus aimed at identifying a fine grain parcellation while maintaining  
313 a steady clustering performance, as indicated by low NVI value. We therefore selected  $K_{\text{best}} = 5$ . Indeed,  
314 higher number of modules (i.e.  $K \geq 6$ ) showed weak reliability of the clustering performance, which may  
315 have led to the calculation of a non-representative community assignment. Finally, the same number of  
316 communities was employed to describe meso-scale organization with other neuroimaging datasets (5).

### 317 **Meso-scale structure has frequency-dependent fingerprints**

318 By relying on the spectral richness of hdEEG recordings, we could investigate how meso-scale and the  
319 related way to route information within the FC network, is organized across frequency bands. According  
320 to our results, the meso-scale structure clearly indicates a frequency-dependent behavior. Indeed, when  
321 increasing the neuronal oscillation frequency from delta to high gamma, the core-periphery structure  
322 increased, showing greater values in the gamma band. Conversely, the disassortative structure showed an  
323 opposite trend when compared to core-periphery, as disassortative organization exhibited high values in  
324 delta and theta rhythms. In addition, the assortative structure was uniformly distributed across the spectrum  
325 and did not show any particular trend. Thus, in the low frequency bands, characterized by long-range  
326 communication (37), information is exchanged across long-distances. This behavior is, in our opinion, well-  
327 expressed by the disassortative structure which is significantly higher in delta and theta when compared to  
328 the other frequencies, thus favoring high information flow between distinct modules (10). Therefore, we  
329 can consider the disassortative structure as a meso-scale fingerprint of the long-distance and slow  
330 oscillations. However, in these low rhythms even the core-periphery structure is comparable with the  
331 disassortative one, suggesting a ‘hybrid’ communication mechanism during resting state. Moreover, at low  
332 frequencies, the clustering in separate and functionally distinct areas is less clear than the higher frequency  
333 bands, because these oscillatory regimens are characterized by long-range interactions (37) which require  
334 communication among several different areas. On the other hand, by increasing the oscillatory frequency  
335 (from delta to low and high gamma band) we encountered not only an increase of the core-periphery meso-  
336 scale structure, but also a clearer subdivision in functional clusters with respect to the low and mid-low  
337 bands (see Figure 4) that, in turn, may reflect a local processing of information. In fact, gamma oscillations  
338 might represent a rhythmic synaptic inhibition mediated by parvalbumin-expressing inhibitory interneurons  
339 and the interconnected pyramidal neurons (38-40). Gamma-oscillations might thus resemble a local  
340 processing of coactive functional areas. Indeed, these functional areas are approximately grouped in the  
341 five modules emerging at 32 and 64 Hz: sensory associative, somatomotor, executive, limbic and visual.  
342 Other studies showed that neuronal oscillations in the gamma band reflect not only a local processing, but  
343 also synchronization across long-distance areas (38, 41). From this perspective, the core-periphery structure  
344 might be a good candidate to support this “dual property” of gamma oscillations: the dense core represents  
345 the local processing, while the numerous interactions between the core and the nodes located in the  
346 peripheries may indicate the presence of the long-distance connections that are also typical of gamma  
347 oscillations (39). In summary, we provided evidence supporting the concept that non-assortative structures  
348 reflect how information is processed in the delta/theta (disassortative) and gamma (core-periphery) bands.



349 Furthermore, despite the considerable amount of disassortative and core-periphery structures at specific  
350 frequencies, we must recall that a certain degree (around 20 % of median values) of assortative structure is  
351 still present and uniformly distributed across the frequency spectrum. According to previous fMRI studies,  
352 the brain presents a mixed meso-scale organization, but the network dominantly exhibits  
353 modular/assortative meso-scale structures, specifically during resting state (5, 10) and, to a lesser extent,  
354 during cognitive tasks (10). Our hdEEG analysis showed that the meso-scale assortative structure is  
355 predominant in the time domain, thus confirming previous findings (see Figure 3). Instead, in the frequency  
356 domain the amount of assortative modules was reduced, and a clear non-assortative organization emerged.

### 357 **Association cortex underlie core-periphery structures**

358 We observed a whole-brain high incidence of core-periphery structure towards the higher-frequency bands,  
359 starting from alpha oscillations. In this overall level of increased core-peripheriness, high-order association  
360 areas belonging to prefrontal and PTO cortices emerged among others. High levels of non-assortativity  
361 have been linked to association areas using fMRI (10). We found that, when decreasing the carrier  
362 frequency, the meso-scale organization changed: there was still a considerable amount of core-periphery,  
363 but the disassortative structure increased, exhibiting a spatially distributed gradient in the middle bands (i.e.  
364 alpha, beta) from posterior to anterior cortices. On the other hand, the prefrontal cortices were strongly  
365 core-periphery. When the frequencies are further decreased, in delta and theta bands, we had the steepest  
366 decrease of core-periphery, favoring an increasing of the disassortative structure (particularly in the medial  
367 frontal and temporal areas) that might underlie spatially distributed information processing (see above).  
368 Overall, the regions selectively exhibited a frequency-specific behavior, in particular when comparing low  
369 (delta/theta) and high rhythms (gamma). Association areas such as PTO showed high degree of core-  
370 peripheriness across frequency bands, corroborating the integrative role of this meso-scale modality. On  
371 the other hand, medial frontal areas exhibited both high degree of core-periphery in the higher bands while  
372 higher level of disassortativity in the lower bands. We therefore posit that the same regions might employ  
373 a specific frequency to route information, underlying a frequency-dependent meso-scale organization that  
374 is also linked to the cortical and subcortical spatial distribution.

375 Our analysis allowed, for the first time, to observe WSBM-estimated meso-scale organization with a  
376 different focus: by investigating FC in different frequency bands, we captured peculiar features of module  
377 interactions revealing the non-assortative nature of resting state networks, demonstrating its frequency-  
378 specificity. Furthermore, this study demonstrated that WSBM applied to sources-level neuronal oscillations  
379 is an effective tool to explore yet unknown properties of FC topological organization.

380 Overall, these results may be taken into consideration for future studies that will address the  
381 pathophysiological mechanisms underlying neurological/psychiatric disorders (16, 42). It would indeed be  
382 crucial to examine how the presence of a neurological disease can affect the meso-scale structure and  
383 whether and how a neurorehabilitation program can impact the re-organization of brain networks and the  
384 interactions among communities. This will have a direct impact in the clinical assessment of sensory, motor  
385 and cognitive functions, being EEG acquisitions widely employed in the clinical setting. Collectively, the  
386 results of our study increase the knowledge of human brain meso-scale organization and of communication  
387 modalities between brain networks, which is still an open topic in network neuroscience (6).

388

389



## 390 **Materials and Methods**

### 391 **Participants**

392 We recruited 32 healthy volunteers ( $29.6 \pm 4.5$  years, mean  $\pm$  SD, 17 females). To be included, the  
393 participants had: *a*) to be right-handed according to the Edinburgh inventory (43); *b*) to be without  
394 neurological or psychiatric disorders; *c*) to have normal or corrected-to-normal vision; *d*) to be free of  
395 psychotropic and/or vasoactive medication. Prior to the experimental procedure, all participants provided  
396 written informed consent. The study, which was in line with the standard of the Declaration of Helsinki,  
397 was approved by the local ethical committee (CER Liguria Ref. 1293 of September 12<sup>th</sup>, 2018).

398

### 399 **Resting state hdEEG recording and MRI acquisition**

400 HdEEG signals were recorded using a 128-channel amplifier (ActiCHamp, Brain Products, Germany) while  
401 participants were comfortably sitting with their eyes open fixating on a white cross on a black screen for  
402 five minutes. Participants were required to relax as much as possible and to fixate on the cross, located in  
403 the middle of a screen in front of them. The experiment was performed according to the approved  
404 guidelines, in a quiet, air-conditioned laboratory with soft natural light. HdEEG signals were collected at  
405 1000 Hz sampling frequency, using the electrode FCz (over the vertex) as physical reference electrode. The  
406 horizontal and vertical electrooculograms (EOG) were collected from the right eye for further identification  
407 and removal of ocular-related artifacts. Prior to resting state hdEEG recordings, the three-dimensional  
408 locations of the 128 electrodes on the scalp were collected with either infrared color-enhanced 3D scanner  
409 (44) or Xensor digitizer (ANT Neuro, The Netherlands). To build each participant's high-resolution head  
410 model, the participants underwent T1-weighted MRI acquisition using either a 3 T (N = 28) or a 1.5 T (N  
411 = 4) scanner (see Suppl. Materials for details about acquisition parameters).

412

### 413 **Pre-processing of hdEEG recordings**

414 HdEEG preprocessing was performed according to the same steps described in previous works (17, 18).  
415 Briefly, we first attenuated the power noise in the EEG channels by using a notch filter centered at 50 Hz.  
416 Later, we identified channels with low signal to noise ratio by following an automatic procedure. We  
417 combined information from two channel-specific parameters: i) the minimum Pearson correlation between  
418 a channel against all the others in the frequency band of interest (i.e. 0.5-100 Hz); ii) the noise variance that  
419 we defined in a band where the EEG information is negligible (i.e. 200-250 Hz). We defined a channel as  
420 "bad", whenever one of the two parameters described above were outliers as compared to the total  
421 distribution of values. We interpolated the identified bad channels with the information of the neighboring  
422 channels, using Field Trip (<http://www.fieldtriptoolbox.org/>). Then, hdEEG signals were band pass filtered  
423 (0.5-100 Hz) with a zero-phase distortion FIR filter and downsampled to 250 Hz. To further reduce noise  
424 in our data, we employed the fast-ICA algorithm (<http://research.ics.aalto.fi/ica/fastica/>) to identify  
425 independent components related to ocular and movement artifacts. To classify the ocular artifacts we used  
426 the following parameters: i) Pearson correlation between the power of the independent components and the  
427 vertical and horizontal EOG; ii) the coefficient of determination obtained by fitting the independent  
428 component (IC) spectrum with a 1/f function. We classified the IC as ocular artifacts if at least one of the  
429 two parameters was above a pre-defined thresholds (0.2 and 0.5, as in (18)). Finally, for movement-related  
430 artifacts, we used the kurtosis of the independent component (we considered a kurtosis exceeding the value

431 of 20 (18) indicated a noisy IC). We re-referenced the artifacts-free signals with the average reference  
432 approach (45).

433

#### 434 **Head model of volume conduction and source reconstruction**

435 We followed the same procedure as detailed in (29). Briefly, we used T1-weighted structural images in  
436 order to generate a realistic volume conductor model. In accordance with previous studies (17, 18), we  
437 assigned conductivity values to 12 tissue classes (skin, eyes, muscle, fat, spongy bone, compact bone, gray  
438 matter, cerebellar gray matter, white matter, cerebellar white matter, cerebrospinal fluid and brainstem),  
439 based on the literature (see Liu et al. (18) for the conductivity values assigned per each tissue class). Then,  
440 given the intrinsic difficulty in segmenting all the 12 classes directly on the T1-weighted individual space,  
441 we warped the MNI (Montreal Neurological Institute) template to individual space using the normalization  
442 tool of SPM12 (<http://www.fil.ion.ucl.ac.uk/spm/software/spm12>), as reported in Liu et al. (18). Then, we  
443 spatially co-registered the 128 electrodes positions onto each individual T1-weighted space. We  
444 approximated the volume conduction model using a finite element method (FEM) and, to estimate the  
445 relationship between the measured scalp potentials and the dipoles corresponding to brain sources, we  
446 employed the Simbio FEM method (<https://www.mrt.uni-jena.de/simbio/>). Finally, by combining the  
447 individual head model conductor and the artifacts-free hdEEG signals, we reconstructed source activity  
448 using the eLORETA (46) algorithm. Sources were constrained within a 6 mm regular grid covering the  
449 cerebral gray matter. Thus, we reconstructed the sources (voxels) per each participant and we then mapped  
450 the voxels time courses into 384 regions of interest (ROIs) of the AICHA atlas (30). This procedure defines  
451 the nodes for the subsequent meso-scale structure investigation. We estimated the activity of each ROI  
452 employing the first principal component of the voxels falling within a sphere centered in the ROI center of  
453 mass and with 6 mm radius.

454

#### 455 **Spectral analysis**

456 We implemented time-frequency analysis by convolving the ROIs signals ( $X_i(t)$ , with  $i = 1..N$ ) with  
457 Generalized Morse Wavelets (GMW), described in (47). This wavelet superfamily guarantees, under certain  
458 parametrizations, a strict analytic behavior and therefore is appropriate for accurate time-frequency  
459 analysis. The GMW is defined, in the frequency domain, as:

$$460 \quad \psi_{\beta,\gamma}(f) = a_{\beta,\gamma} f^\beta e^{-f^\gamma}$$

461 Where,  $a_{\beta,\gamma} = 2(e\gamma/\beta)^{\beta/\gamma}$  is a normalizing constant,  $f$  are the carrier frequencies of the wavelet, and  $\beta$   
462 and  $\gamma$  are the two parameters controlling the wavelet shape. As suggested in (47), a choice of  $\gamma = 3$ ,  
463 guarantees the most symmetric, most nearly Gaussian, and generally most frequency concentrated member  
464 of the GMW superfamily. In this work, we thus set  $\gamma = 3.00$  and  $\beta = 11.33$  to capture the essential idea of  
465 the widely used Morlet wavelet (27), while avoiding aliasing for specific parameter choices (47). We used  
466 23 carrier frequencies, ranging from  $2^{0.5}$  to  $2^6$  Hz in quarter steps ( $f = 2^{(0.5:0.25:6)}$  Hz), to cover a large part  
467 of the EEG spectrum with a fine detail. We employed the Matlab version of the Jlab toolbox (freely  
468 available online: <http://www.jmlilly.net/jmlsoft.html>).

469

470

## 471 **Functional connectivity analysis in the time domain**

472 We defined the single-subject FC matrix ( $ADJ_S^T$ ,  $384 \times 384$ ,  $S = 1..32$ ) using the Pearson's correlation  
473 coefficient ( $r$ ) between the time course of each pair of ROIs. Then, to explore FC in the time domain, we  
474 averaged single-subject's adjacency matrices and we regressed out the effect of the Euclidean distance  
475 between the ROIs since we considered the Euclidean distance as a covariate of no interest, as performed in  
476 Betzel et al. (5) We obtained a group level representative matrix ( $ADJ_G^T$ ) whose elements (i.e. the weights)  
477 contained the strength of the connection between brain regions. We Fisher-transformed ( $\text{arctanh}(ADJ_G^T)$ )  
478 the resulting correlation values of the group-representative FC matrix to improve Gaussianity. Finally, we  
479 linearly mapped  $ADJ_G^T$  values between the  $[-1, +1]$  range, obtaining:

$$480 \quad ADJ^T = b_1 + \left( \frac{(val - a_1)(b_2 - b_1)}{(a_2 - a_1)} \right)$$

481 Where  $val$  is a single element of  $ADJ_G^T$ ;  $a_1$ ,  $a_2$  are the minimum and maximum edges value of  $ADJ_G^T$ ;  $b_1$ ,  $b_2$   
482 are the limits of the new range -1 and +1. This linear transformation allows for further comparison of the  
483 meso-scale structure among different frequency content (see next section *cf.* 'Functional connectivity in the  
484 frequency domain'). It is indeed necessary to normalize the weights of the adjacency matrices in the same  
485 range to compare outputs of the WSBM, according to the literature (12).

486

## 487 **Functional connectivity analysis in the frequency domain**

488 To measure the frequency-specific properties of FC, we employed the method of power envelope  
489 orthogonalization (27) that is necessary in order to estimate the pairwise connection strength among the  
490 ROIs. Indeed, although the brain activity estimation at the sources level is a promising tool to investigate  
491 the brain dynamics at both good spatial and high temporal resolutions, it is affected by the signal leakage  
492 problem (26, 27). Reconstructing cortical and sub-cortical sources (several thousand sources) from scalp  
493 potentials (here 128 electrodes) is an ill-posed inverse problem, introducing artefactual cross-correlations  
494 between sources. A recent validation study (35) established the power envelope orthogonalization as a valid  
495 candidate to estimate the physiological FC properties in the field of neuroimaging by electrophysiological  
496 recordings. Thus, for each wavelet carrier frequency and participant, we followed the same  
497 orthogonalization procedure, described in previous EEG studies (17, 26), leading to the estimation of  
498  $ADJ_S^F(f)$  ( $f = 2^{(0.5:0.25:6)}$ ;  $S = 1..32$ ). The group-representative adjacency matrices ( $ADJ^F(f)$ ) were  
499 obtained starting from the single subject adjacency matrices  $ADJ_S^F(f)$  and performing the same procedure  
500 described for the time domain (*cf.* 'Functional connectivity analysis in the time domain'). The same  
501 regressing and mapping procedures were also implemented for the analysis of single subject adjacency  
502 matrices that were employed to calculate the percentage of each community interaction.

503

## 504 **Community detection via Weighted Stochastic Block Models**

505 WSBM is as an unsupervised learning algorithm for the identification of network communities that group  
506 together network nodes that have similar FC patterns (12). The WSBM can work without the need of  
507 thresholding the adjacency matrix, as this procedure might have a negative impact on the analysis of the  
508 meso-scale structure of network connectivity, as previously reported (12). The WSBM goal is to learn the  
509 hidden community structure that is estimated from both the existence and the weights of edges. Moreover,  
510 an interesting property is that the algorithm retains the principle of stochastic equivalence, that is, all the  
511 nodes in a community have the same probability of being connected with all the remaining communities of

512 the network. This last property is important in differentiating this community detection problem from the  
513 modularity maximization algorithms that are extensively employed for community detection in network  
514 neuroscience and are by nature biased towards the assortative community structure. Additionally, it is  
515 important to note that stochastic block-modelling has the unmet advantage of being a generative model, as  
516 it tries to estimate the process underlying the observed network topology. The WSBM learns two  
517 parameters starting from the adjacency matrix (in this section, for general explanation, we refer to any  
518 adjacency matrix, being it either in time or frequency domain or obtained by single or group level, by using  
519 the notation  $ADJ$ ) and from a priori assumptions about the distributions of edges weights and existence of  
520 edges. An important parameter is the vector of nodes assignment  $Z = [z_1, \dots, z_N]$  where  $z_j \in \{1, \dots, K\}$ , with  
521  $N$  the number of nodes and  $K$  the number of communities the algorithm must learn. The other parameter is  
522 the edge bundle matrix (or affinity matrix)  $\theta ([K \times K])$ , representing the probability of two communities  
523 being connected. It is worth noting that the probability of connection between two nodes only depends on  
524 their community labels assignment,  $p_{ij} = \theta_{z_i z_j}$ . In its formulation, the log-likelihood of the adjacency  
525 matrix being described by the parameters  $\theta$  and  $Z$ , can be written as (5, 12):

$$526 \quad \log[p(ADJ|Z, \theta)] = \alpha \left[ \sum_{ij} T_e(ADJ_{ij}) \eta_e(\theta_{z_i z_j}^{(e)}) \right] + (1 - \alpha) \left[ \sum_{ij} T_w(ADJ_{ij}) \eta_w(\theta_{z_i z_j}^{(w)}) \right]$$

527 where  $\alpha$  is a tuning parameter that combines the contribution of the two summations, which respectively  
528 model edges weights and edges existence, to infer the latent community structure.  $T_e(ADJ_{ij}), \eta_e(\theta_{z_i z_j}^{(e)})$  and  
529  $T_w(ADJ_{ij}), \eta_w(\theta_{z_i z_j}^{(w)})$  are the sufficient statistics and the natural parameters of the exponential family  
530 describing the distributions of the edges existence ( $T_e, \eta_e$ ) and the edges weights ( $T_w, \eta_w$ ). Lastly,  $i, j$   
531 indicate the edges of the adjacency matrix onto which we inferred the latent community structure. Usually,  
532 when applying the WSBM framework to structural and functional brain networks, the edges existence and  
533 weights are drawn from Bernoulli and Normal distributions (5, 10, 13, 14), respectively. In our case,  $\alpha$  is  
534 set to zero because the graph is fully connected (i.e. no thresholding applied) and, thus, we did not need to  
535 model the edges existence. Hence, our likelihood maximization is simplified leading to a pure-WSBM (12)  
536 (pWSBM) that learns from the weights information, that are assumed to be normally-distributed between  
537 communities. The remaining issue is to find a reliable estimation of the posterior distribution, i.e.  
538  $p(Z, \theta | ADJ)$  that has no explicit analytic formulation (12). To this purpose, we made use of the code freely  
539 available here (<http://tuvalu.santafe.edu/~aaronc/wsbm/>). The code finds an approximation of the posterior  
540 probability using a Variational Bayes (VB) approach. VB provides a solution to approximate the unknown  
541 posterior distribution by transforming an inference problem into an optimization problem. The algorithm  
542 minimizes the Kullback-Lieber divergence  $D_{KL}$  (48) to the posterior probability (for further information  
543 about  $D_{KL}$  applied to WSBM, see (12)). The solution proposed by (12) states that minimizing the  $D_{KL}$  is  
544 equivalent to maximize the evidence lower bound of the model marginal log-likelihood (logEvidence),  
545  $p(ADJ|Z, \theta)$ . Thus, the best approximation of the posterior is obtained through a procedure aimed at  
546 maximizing the logEvidence score. Thus, if the logEvidence is maximized, the  $D_{KL}$  is the closest possible  
547 to the posterior distribution,  $p(Z, \theta | ADJ)$ . After properly initializing the priors for  $\theta$  and  $z$  the VB algorithm  
548 takes the best (i.e. the greatest) logEvidence value across multiple independent trials (or restarts) of the  
549 algorithm. We choose a maximum of 100 independent trials to find the best logEvidence value. Within this  
550 limit, the algorithm searches for the best logEvidence value. At each trial, the initial probability of a node  
551 being assigned to a community is randomized. Every time a better logEvidence value (i.e. a better solution)  
552 is obtained, the algorithm updates the solution. We selected the communities assignment in correspondence  
553 of the highest logEvidence value. We run the WSBM model for different values of  $K$  and we performed a

554 parameter selection procedure to infer the best number of K communities for our dataset, as described in  
555 the next section.

556

### 557 **Parameter selection: optimal number of communities**

558 The main idea behind our parameter selection procedure is to look at the stability of the clustering  
559 performance, i.e. the aim was to find the best number of communities K for which the clustering  
560 performance is as stable as possible. As a first step towards this goal, we performed 200 WSBM fits, each  
561 one consisting of a maximum of 100 independent trials, on the group level adjacency matrix computed in  
562 the time domain ( $ADJ^T$ , full bandwidth). We calculated 200 WSBM fits for different values of K (ranging  
563 from 2 to 16). To evaluate the clustering performance, we calculated the Normalized Variation of  
564 Information (31) (NVI) across each pair of fits. We averaged across the fits selecting the best K-values  
565 corresponding to the smallest NVI values. Indeed, the lower the NVI the more stable is the clustering  
566 performance. To further validate our choice, we also checked the cluster performance by using two other  
567 metrics: the Adjusted Rand Index (32) (ARI) and the Normalized Mutual Information (31) (NMI). For these  
568 metrics, a consistent matching between couple of fits corresponds to NMI = 1 and to ARI = 1. With this  
569 parameter selection procedure, we obtained the best number of communities and we used it to investigate  
570 the meso-scale structure in both time and frequency domains (at both group and single subject level).

571

### 572 **Community assignment in the time and frequency domain: central fit**

573 Once we defined the best number of communities at the group level ( $K_{\text{best}}$ ), we needed to choose the best  
574 nodes assignment among the 200 fits. Therefore, we used the community assignment corresponding to the  
575 central fit across the 200 fits. We defined the central fit as the fit whose distance is minimized from all the  
576 others fits using the NVI, as in a previous work (13) (we used the function *partition\_distance.m* of the Brain  
577 Connectivity Toolbox (49)). We used the central fit not only to identify and to show the resulting  
578 communities at the group level, but also for all the subsequent steps of our analysis: the investigation of  
579 how the percentage of between-community interactions varies across frequencies. Indeed, in addition to fit  
580 the WSBM generative model with the group level time domain ( $ADJ^T$ ) and frequency domain ( $ADJ^F$ )  
581 matrices, we also fitted the model for  $K = K_{\text{best}}$  at the single-subject level ( $ADJ_S^T$  and  $ADJ_S^F$ ): for each  
582 participant we thus performed 100 WSBM fits and we selected as best fit the central one, employing NVI,  
583 as for the group level. The central fit was calculated both for the time domain ( $ADJ_S^T$ ) and six carrier  
584 frequencies ( $ADJ_S^F(f)$ ,  $f = 2$  Hz, 4 Hz, 8 Hz, 16 Hz, 32 Hz, 64 Hz). These carrier frequencies have been  
585 chosen as a subset of those selected in previous studies (26, 27). Note that due to high computational cost,  
586 we performed the latter frequency-domain analysis across 100 fits.

587

### 588 **Characterizing the meso-scale structure: between-community interactions**

589 At the single-subject level, we investigated how pairs of communities interacted with each other in order  
590 to generate assortative, disassortative and core-periphery architecture. This permitted us to investigate the  
591 between-community interactions in both time and frequency domains. For each pair of communities r and  
592 s, we estimated the within- and between- community density (10), a topological property of the detected  
593 modules (9):

$$594 \quad \omega_{rr} = \frac{1}{N_r N_r} \sum_{x \in r} \sum_{y \in r} ADJ_{S,xy}; \quad \omega_{cc} = \frac{1}{N_c N_c} \sum_{x \in c} \sum_{y \in c} ADJ_{S,xy}; \quad \omega_{rc} = \frac{1}{N_r N_c} \sum_{x \in r} \sum_{y \in c} ADJ_{S,xy};$$



595 Where,  $N_r$  and  $N_c$  are the number of nodes assigned to the communities  $r$  and  $c$  at the central fit. We  
596 calculated community density for the time domain  $ADJ_S^T$  and for the different frequencies  $ADJ_S^F(f)$  at the  
597  $K_{best}$ . Then, the between-community interactions fall into one of the three categories as reported in (5, 10),  
598 according to the following criteria:

$$599 \quad M_{rc} = \begin{cases} M_{assortative} & \text{if } \min(\omega_{rr}, \omega_{cc}) > \omega_{rc} \\ M_{core-periphery} & \text{if } \omega_{rr} > \omega_{rc} > \omega_{cc} \text{ or } \omega_{cc} > \omega_{rc} > \omega_{rr} \\ M_{disassortative} & \text{if } \omega_{rc} > \max(\omega_{rr}, \omega_{cc}) \end{cases}$$

600 We calculated the percentage of between-community interactions for each participant with respect to the  
601 total number of possible interactions, corresponding to  $\frac{1}{2}[K_{best} \cdot (K_{best} - 1)]$ . Then, we averaged the  
602 percentage across all participants for the time domain and for the six carrier frequencies.

603

### 604 **Statistical analysis of between-community interactions**

605 Our working hypothesis is to understand whether the meso-scale connectivity organizes across frequency  
606 bands, i.e. the meso-scale connectivity has frequency-specific features. Prior to testing this hypothesis, we  
607 performed statistical testing to check how meso-scale arranges in the time domain. Given the non-normality  
608 of the distributions, we employed non-parametric tests. We used the Kruskal-Wallis test to examine whether  
609 the meso-scale structure shows a statistically significant effect of the between-community classes. Then,  
610 we employed a post-hoc comparison of mean ranks as implemented in Statistica 13 software package  
611 (StatSoft Inc., Tulsa) to investigate potential differences among the three interaction classes. For the  
612 frequency analysis, we also performed a set of Kruskal-Wallis tests to verify for each interaction class (i.e.  
613 assortative, disassortative and core-periphery) whether the carrier frequency has a statistically significant  
614 effect. Finally, a post-hoc comparison of mean ranks has been used to further highlight the potential  
615 differences among the six carrier frequencies within each community class.

616

617

## 618 **References**

- 619 1. K. J. Friston, Functional and effective connectivity: a review. *Brain Connect* **1**, 13-36 (2011).
- 620 2. A. T. Reid *et al.*, Advancing functional connectivity research from association to causation. *Nature*
- 621 *Neuroscience* **22**, 1751-1760 (2019).
- 622 3. R. F. Betzel, D. S. Bassett, Multi-scale brain networks. *Neuroimage* **160**, 73-83 (2017).
- 623 4. M. N. Hallquist, F. G. Hillary, Graph theory approaches to functional network organization in brain
- 624 disorders: A critique for a brave new small-world. *Netw Neurosci* **3**, 1-26 (2019).
- 625 5. R. F. Betzel, J. D. Medaglia, D. S. Bassett, Diversity of meso-scale architecture in human and non-
- 626 human connectomes. *Nat Commun* **9**, 346 (2018).
- 627 6. O. Sporns, Graph theory methods: applications in brain networks. *Dialogues Clin Neurosci* **20**,
- 628 111-121 (2018).
- 629 7. K. Glomb *et al.*, Using structural connectivity to augment community structure in EEG functional
- 630 connectivity. *bioRxiv*, 831743 (2019).
- 631 8. M. E. J. Newman, Modularity and community structure in networks. *P Natl Acad Sci USA* **103**,
- 632 8577-8582 (2006).
- 633 9. J. O. Garcia, A. Ashourvan, S. F. Muldoon, J. M. Vettel, D. S. Bassett, Applications of Community
- 634 Detection Techniques to Brain Graphs: Algorithmic Considerations and Implications for Neural
- 635 Function. *P Ieee* **106**, 846-867 (2018).
- 636 10. R. Betzel, M. A Bertolero, D. Bassett, *Non-assortative community structure in resting and task-*
- 637 *evoked functional brain networks.* (2018).
- 638 11. S. Fortunato, Community detection in graphs. *Phys Rep* **486**, 75-174 (2010).
- 639 12. C. Aicher, A. Jacobs, A. Clauset, *Learning Latent Block Structure in Weighted Networks.* (2014),
- 640 vol. 3.
- 641 13. J. Faskowitz, X. Yan, X. N. Zuo, O. Sporns, Weighted Stochastic Block Models of the Human
- 642 Connectome across the Life Span. *Sci Rep* **8**, 12997 (2018).
- 643 14. J. Faskowitz, O. Sporns, Mapping the community structure of the rat cerebral cortex with weighted
- 644 stochastic block modeling. *Brain Structure and Function*, 1-14 (2019).
- 645 15. D. M. Pavlovic, P. E. Vertes, E. T. Bullmore, W. R. Schafer, T. E. Nichols, Stochastic
- 646 blockmodeling of the modules and core of the *Caenorhabditis elegans* connectome. *PLoS One* **9**,
- 647 e97584 (2014).
- 648 16. M. Siegel, T. H. Donner, A. K. Engel, Spectral fingerprints of large-scale neuronal interactions.
- 649 *Nat Rev Neurosci* **13**, 121-134 (2012).
- 650 17. J. Samogin, Q. Liu, M. Marino, N. Wenderoth, D. Mantini, Shared and connection-specific intrinsic
- 651 interactions in the default mode network. *Neuroimage* **200**, 474-481 (2019).
- 652 18. Q. Y. Liu, S. Farahibozorg, C. Porcaro, N. Wenderoth, D. Mantini, Detecting Large-Scale
- 653 Networks in the Human Brain Using High-Density Electroencephalography. *Hum Brain Mapp* **38**,
- 654 4631-4643 (2017).
- 655 19. M. Seeber *et al.*, Subcortical electrophysiological activity is detectable with high-density EEG
- 656 source imaging. *Nature Communications* **10**, (2019).
- 657 20. A. Coito *et al.*, Altered directed functional connectivity in temporal lobe epilepsy in the absence of
- 658 interictal spikes: A high density EEG study. *Epilepsia* **57**, 402-411 (2016).
- 659 21. S. Waninger *et al.*, Neurophysiological Biomarkers of Parkinson's Disease. *Journal of Parkinson's*
- 660 *Disease*, 1-10 (2020).
- 661 22. R. Cassani, M. Estarellas, R. San-Martin, F. J. Fraga, T. H. Falk, Systematic Review on Resting-
- 662 State EEG for Alzheimer's Disease Diagnosis and Progression Assessment. *Dis Markers* **2018**,
- 663 5174815 (2018).
- 664 23. A. Damborská *et al.*, Altered directed functional connectivity of the right amygdala in depression:
- 665 high-density EEG study. *Scientific Reports* **10**, 1-14 (2020).
- 666 24. B. He, A. Sohrabpour, E. Brown, Z. M. Liu, Electrophysiological Source Imaging: A Noninvasive
- 667 Window to Brain Dynamics. *Annu Rev Biomed Eng* **20**, 171-196 (2018).

- 668 25. N. Coquelet *et al.*, Comparing MEG and high-density EEG for intrinsic functional connectivity  
669 mapping. *NeuroImage*, 116556 (2020).
- 670 26. M. Siems, A. A. Pape, J. F. Hipp, M. Siegel, Measuring the cortical correlation structure of  
671 spontaneous oscillatory activity with EEG and MEG. *Neuroimage* **129**, 345-355 (2016).
- 672 27. J. F. Hipp, D. J. Hawellek, M. Corbetta, M. Siegel, A. K. Engel, Large-scale cortical correlation  
673 structure of spontaneous oscillatory activity. *Nat Neurosci* **15**, 884-890 (2012).
- 674 28. F. de Pasquale, M. Corbetta, V. Betti, S. Della Penna, Cortical cores in network dynamics.  
675 *Neuroimage* **180**, 370-382 (2018).
- 676 29. R. Iandolo *et al.*, Small-World Propensity Reveals the Frequency Specificity of Resting State  
677 Networks. *IEEE Open Journal of Engineering in Medicine and Biology*, (2020).
- 678 30. M. Joliot *et al.*, AICHA: An atlas of intrinsic connectivity of homotopic areas. *J Neurosci Methods*  
679 **254**, 46-59 (2015).
- 680 31. M. Meila, Comparing clusterings - an information based distance. *J Multivariate Anal* **98**, 873-895  
681 (2007).
- 682 32. L. Hubert, P. Arabie, Comparing Partitions. *J Classif* **2**, 193-218 (1985).
- 683 33. G. L. Colclough, M. J. Brookes, S. M. Smith, M. W. Woolrich, A symmetric multivariate leakage  
684 correction for MEG connectomes. *Neuroimage* **117**, 439-448 (2015).
- 685 34. M. X. Cohen, Analyzing Neural Time Series Data: Theory and Practice. *Iss Clin Cogn Neurop*, 1-  
686 578 (2014).
- 687 35. M. Siems, M. Siegel, Dissociated neuronal phase- and amplitude-coupling patterns in the human  
688 brain. *Neuroimage* **209**, 116538 (2020).
- 689 36. R. L. van den Brink *et al.*, Task-free spectral EEG dynamics track and predict patient recovery  
690 from severe acquired brain injury. *Neuroimage Clin* **17**, 43-52 (2018).
- 691 37. A. T. Leong *et al.*, Long-range projections coordinate distributed brain-wide neural activity with a  
692 specific spatiotemporal profile. *Proc Natl Acad Sci U S A* **113**, E8306-E8315 (2016).
- 693 38. V. S. Sohal, How close are we to understanding what (if anything)  $\gamma$  oscillations do in cortical  
694 circuits? *Journal of Neuroscience* **36**, 10489-10495 (2016).
- 695 39. V. S. Sohal, Insights into cortical oscillations arising from optogenetic studies. *Biological*  
696 *psychiatry* **71**, 1039-1045 (2012).
- 697 40. G. Buzsáki, N. Logothetis, W. Singer, Scaling brain size, keeping timing: evolutionary preservation  
698 of brain rhythms. *Neuron* **80**, 751-764 (2013).
- 699 41. G. Buzsáki, E. W. Schomburg, What does gamma coherence tell us about inter-regional neural  
700 communication? *Nature neuroscience* **18**, 484 (2015).
- 701 42. C. Babiloni *et al.*, International Federation of Clinical Neurophysiology (IFCN)–EEG research  
702 workgroup: Recommendations on frequency and topographic analysis of resting state EEG  
703 rhythms. Part 1: Applications in clinical research studies. *Clinical Neurophysiology*, (2019).
- 704 43. R. C. Oldfield, The assessment and analysis of handedness: the Edinburgh inventory.  
705 *Neuropsychologia* **9**, 97-113 (1971).
- 706 44. G. A. Taberna, R. Guarnieri, D. Mantini, SPOT3D: Spatial positioning toolbox for head markers  
707 using 3D scans. *Scientific reports* **9**, 1-9 (2019).
- 708 45. Q. Liu *et al.*, Estimating a neutral reference for electroencephalographic recordings: the importance  
709 of using a high-density montage and a realistic head model. *Journal of neural engineering* **12**,  
710 056012 (2015).
- 711 46. R. D. Pascual-Marqui *et al.*, Assessing interactions in the brain with exact low-resolution  
712 electromagnetic tomography. *Philos Trans A Math Phys Eng Sci* **369**, 3768-3784 (2011).
- 713 47. J. M. Lilly, S. C. Olhede, Generalized Morse Wavelets as a Superfamily of Analytic Wavelets. *Ieee*  
714 *T Signal Proces* **60**, 6036-6041 (2012).
- 715 48. C. W. Fox, S. J. Roberts, A tutorial on variational Bayesian inference. *Artificial intelligence review*  
716 **38**, 85-95 (2012).
- 717 49. M. Rubinov, O. Sporns, Complex network measures of brain connectivity: Uses and interpretations.  
718 *Neuroimage* **52**, 1059-1069 (2010).

719 **Acknowledgments**

720 The authors would like to thank the Rehab Technologies IIT-INAIL joint lab led by Dr Lorenzo De Michieli  
721 for supporting the conducted research. The authors would like to thank Gaia Bonassi, Mingqi Zhao and  
722 Federico Barban for collecting part of the experimental data used in this work. The authors are grateful to  
723 Silvia Chiappalone for assistance with the graphics and Samuel Stedman for carefully proofreading the  
724 manuscript.

725 **Author contribution**

726 R.I., M.C. conceived the study. R.I., M.S. collected the data. R.I., M.S, D.S., S.B. and M.C. designed the  
727 methods. R.I., M.S. performed the analysis. R.I., M.S., D.M., L.A. and M.C. interpreted and discussed the  
728 results. R.I., M.C. prepared the figures. R.I. wrote the first version of the manuscript. All the authors  
729 contributed to the revision of the manuscript.

730 **Competing Interest**

731 All the authors declare no financial interest.

732 **Data Availability**

733 All data needed to evaluate the conclusions in the paper are present in the paper and/or the Supplementary  
734 Materials. Additional data related to this paper may be requested from the authors.

735 **Funding**

736 Part of this work was supported by the Gossweiler foundation, granted to L. Avanzino (PI), D. Mantini,  
737 and M. Chiappalone.

738

739

740 **Supplementary Materials**

741 **Figure S1**

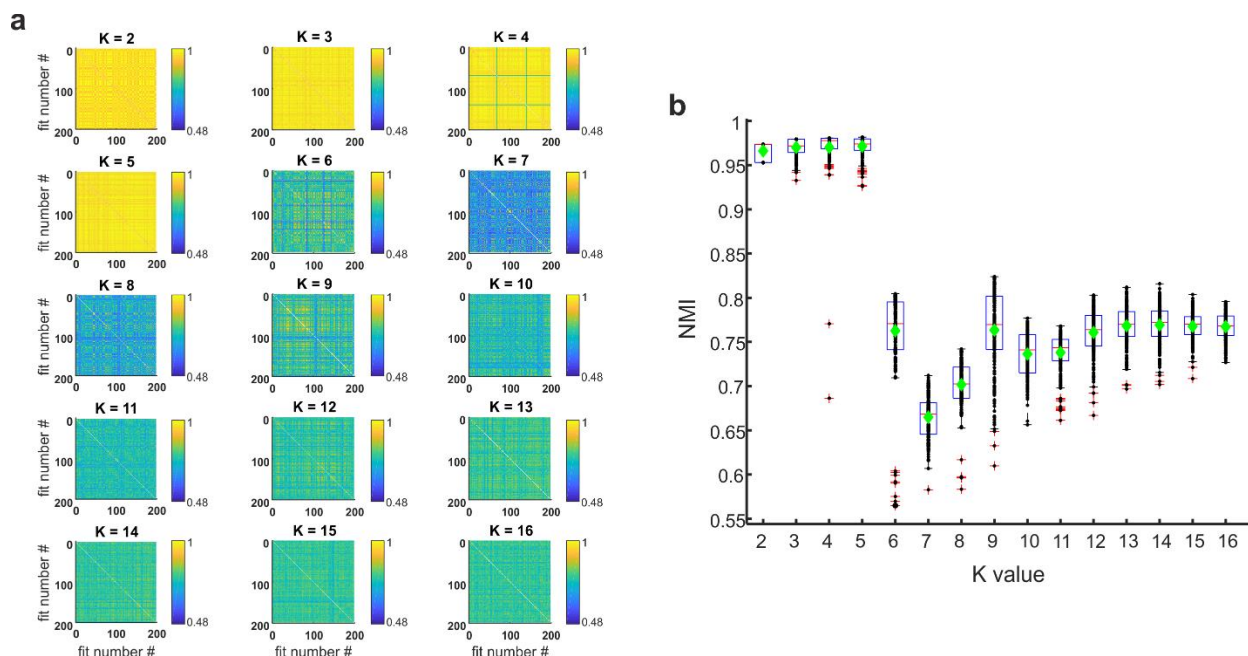

742

743 **Parameter selection conducted by means of Normalized Mutual Information (NMI).** **a** Pairwise  
744 comparisons of all the 200 fits from  $K = 2$  until  $K = 16$ . Yellow and dark blue elements indicate respectively  
745 a pair of fits showing a good (high NMI) and weak (low NMI) clustering performance, as indicated by the  
746 color-bar. Self-fit comparisons are depicted in white. Note that all the matrices are symmetric. **b**  
747 Distributions of the NMI values obtained by averaging the matrices containing the fits' pairwise  
748 comparisons depicted in panel a. Boxplots' upper and lower boundary exhibited 25<sup>th</sup> and 75<sup>th</sup> percentile,  
749 respectively. Data points (black dots) are overlaid over boxplots. Green diamonds and red lines indicates  
750 mean and median value of the distributions, respectively. Red crosses indicate outliers, i.e. those fits for  
751 which the WSBM algorithm found a solution that is far from almost all the remaining fits. The clustering  
752 performance is reliable until  $K = 5$  ("good performance", NMI values are close to one), unreliable otherwise  
753  $K \geq 6$  ("bad performance").

754

755

756



757 **Figure S2**

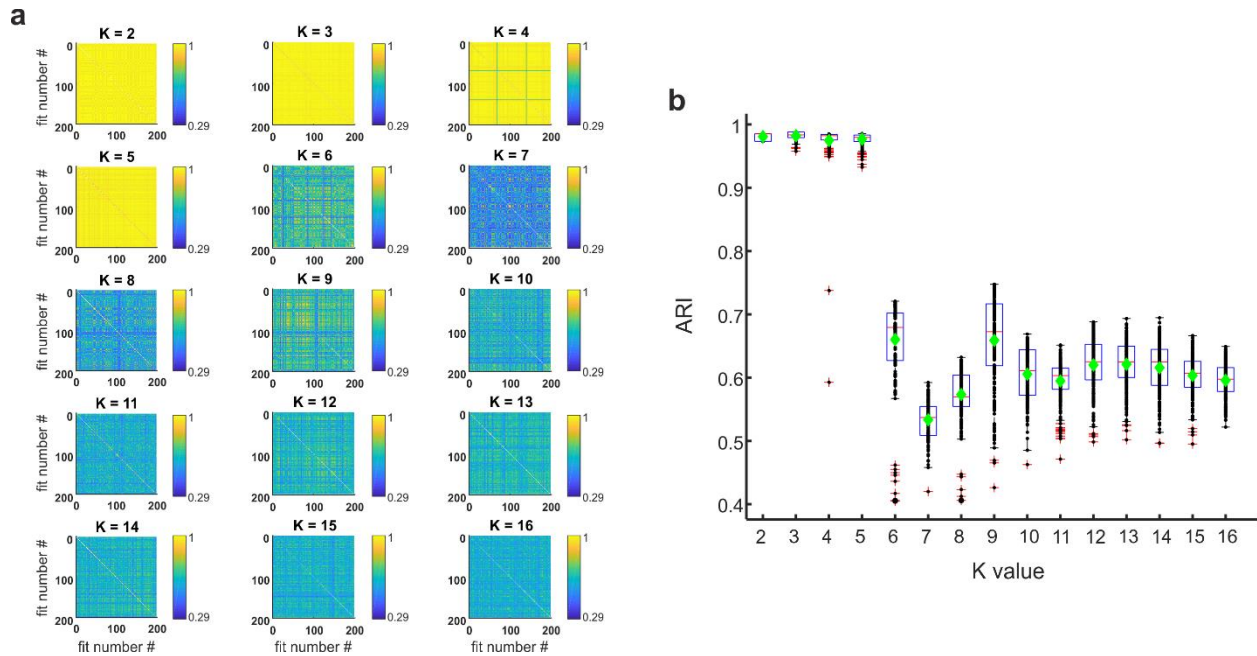

758

759 **Parameter selection conducted by means of Adjusted Rand Index (ARI).** **a** Pairwise comparisons of all  
760 the 200 fits from  $K = 2$  until  $K = 16$ . Yellow and dark blue elements indicate respectively a pair of fits  
761 showing a good (high ARI) and weak (low ARI) clustering performance, as indicated by the color-bar. Self-  
762 fit comparisons are depicted in white. Note that all the matrices are symmetric. **b** Distributions of the ARI  
763 values obtained by averaging the matrices containing the fits' pairwise comparisons depicted in a. Boxplots'  
764 upper and lower boundary exhibited 25<sup>th</sup> and 75<sup>th</sup> percentile, respectively. Data points (black dots) are  
765 overlaid over boxplots. Green diamonds and red lines indicate the mean and median value of the  
766 distributions, respectively. Red crosses are outliers i.e. those fits for which the WSBM algorithm found a  
767 solution that is far from almost all the remaining fits. The clustering performance is reliable until  $K = 5$   
768 ("good performance", ARI values are close to one), unreliable otherwise  $K \geq 6$  ("bad performance").

769

770 **Figure S3**

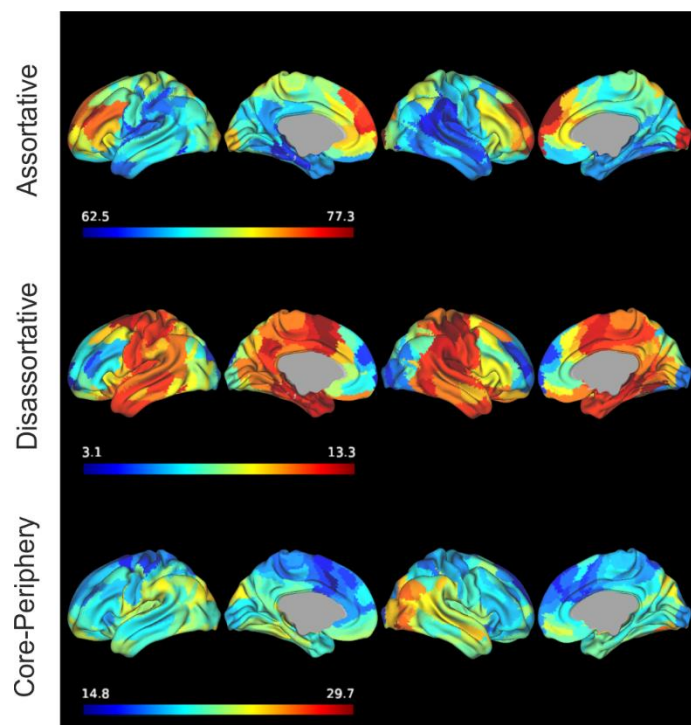

771

772 **Mean community interactions in the time domain across participants.** The color-bar is different for  
773 each meso-scale modality to better appreciate region-specific variations. See Figure 3 in the main text where  
774 the same plot is shown with a unique color-bar for all the interactions.

775

776 **Figure S4**

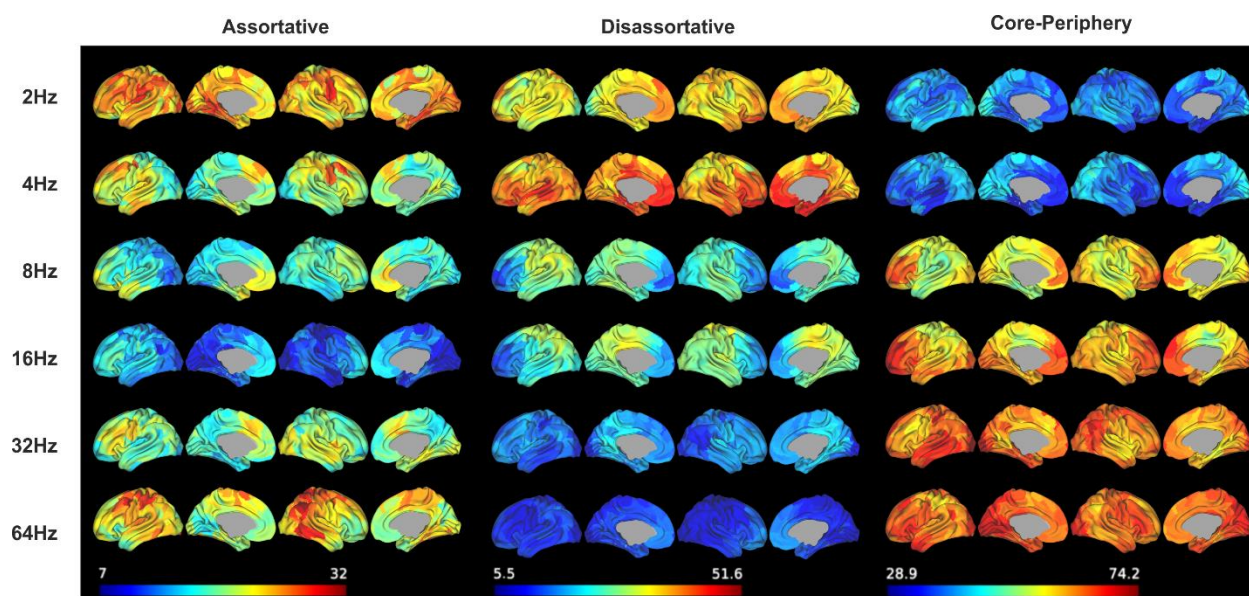

777

778 **Mean community interactions in the frequency domain across participants.** Each column indicates the  
779 meso-scale class (assortative, disassortative, core-periphery) while each row indicates the carrier frequency  
780 (2 Hz, 4 Hz, 8 Hz, 16 Hz, 32 Hz, 64 Hz). The color-bar is customized between minimum and maximum  
781 values within each meso-scale modality. See Figure 6 in the main text where the same plot is showed with  
782 a unique color-bar for all the interactions.

783

784

785 **Table 1**

| Carrier | 2 Hz | 4Hz  | 8Hz  | 16 Hz | 32 Hz    | 64 Hz    |
|---------|------|------|------|-------|----------|----------|
| 2 Hz    |      | N.S. | N.S. | N.S.  | 0.006976 | 0.000052 |
| 4 Hz    |      |      | N.S. | N.S.  | 0.000109 | 0.000000 |
| 8 Hz    |      |      |      | N.S.  | N.S.     | N.S.     |
| 16 Hz   |      |      |      |       | N.S.     | 0.045109 |
| 32 Hz   |      |      |      |       |          | N.S.     |
| 64 Hz   |      |      |      |       |          |          |

786

787 **Non-parametric Kruskal-Wallis test for multiple comparisons across frequencies for the**  
 788 **disassortative class.**

789

790 **Table 2**

| Carrier | 2 Hz | 4Hz  | 8Hz      | 16 Hz    | 32 Hz    | 64 Hz    |
|---------|------|------|----------|----------|----------|----------|
| 2 Hz    |      | N.S. | 0.042072 | 0.002715 | 0.000630 | 0.001264 |
| 4 Hz    |      |      | N.S.     | 0.005335 | 0.001312 | 0.002561 |
| 8 Hz    |      |      |          | N.S.     | N.S.     | N.S.     |
| 16 Hz   |      |      |          |          | N.S.     | N.S.     |
| 32 Hz   |      |      |          |          |          | N.S.     |
| 64 Hz   |      |      |          |          |          |          |

791

792 **Non-parametric Kruskal-Wallis test for multiple comparisons across frequencies for the core-**  
 793 **periphery class.**

794 Note that assortative interactions across frequencies were non-statistically significant and thus we did not  
 795 perform the multiple comparison test.

796

797

798 **T1-weighted structural images acquisition**

799 Subjects underwent T1-weighted using either a 3T or 1.5 T scanners. See Supplementary Table 3 for the  
800 T1-weighted acquisition parameters.

801 **Table 3**

| Number of subject         | 21                                                              | 7                                                               | 4                                                     |
|---------------------------|-----------------------------------------------------------------|-----------------------------------------------------------------|-------------------------------------------------------|
| MRI scanner               | 3T Achieva<br>(Philips Medical System, The Netherlands)         | 3 T MAGNETOM Prisma (Siemens AG, Healthcare Sector, Germany)    | 1.5 T Signa Excite (General Electric Healthcare, USA) |
| T1-weighted sequence name | Magnetization Prepared Rapid Acquisition Gradient Echo (MPRAGE) | Magnetization Prepared Rapid Acquisition Gradient Echo (MPRAGE) | Fast Spoiled Gradient Echo (SPGR)                     |
| Coil                      | 32-channel head coil                                            | 32-channel head coil                                            | 8-channels phased array head coil                     |
| Voxel Size                | 0.98×0.98×1.2 mm <sup>3</sup>                                   | 1×1×1 mm <sup>3</sup>                                           | 1×1×1 mm <sup>3</sup>                                 |
| TR/TE                     | 9.6/4.6 ms                                                      | 2.3/2.96 ms                                                     | 11.8/5.18 ms                                          |
| Field of View (F.O.V)     | 250x250 mm <sup>2</sup>                                         | 256×256 mm <sup>2</sup>                                         | 256×256 mm <sup>2</sup>                               |

802
